# Supplementary material for: Mutations associated with autism lead to similar synaptic and behavioral alterations in both sexes of male and female mouse brain
Source: PubMed Central journal article supplement (PMC10766975; doi:10.1038/s41598-023-50248-4), 2024-01-04

All Original western blot  
uncropped images

Shank3 male group

# Shank3 Male SYP

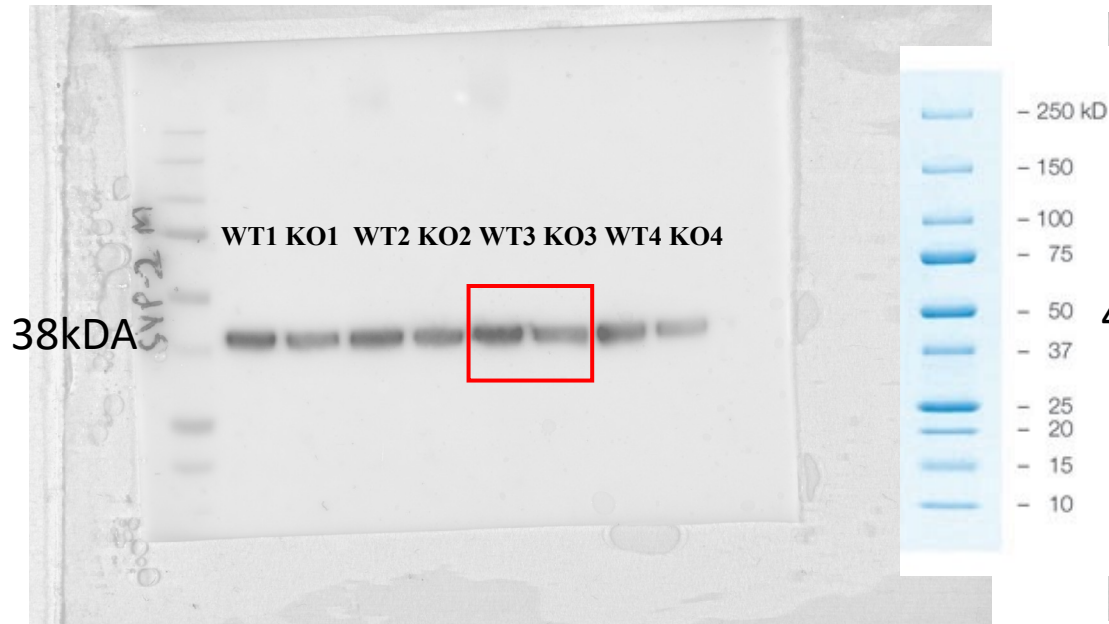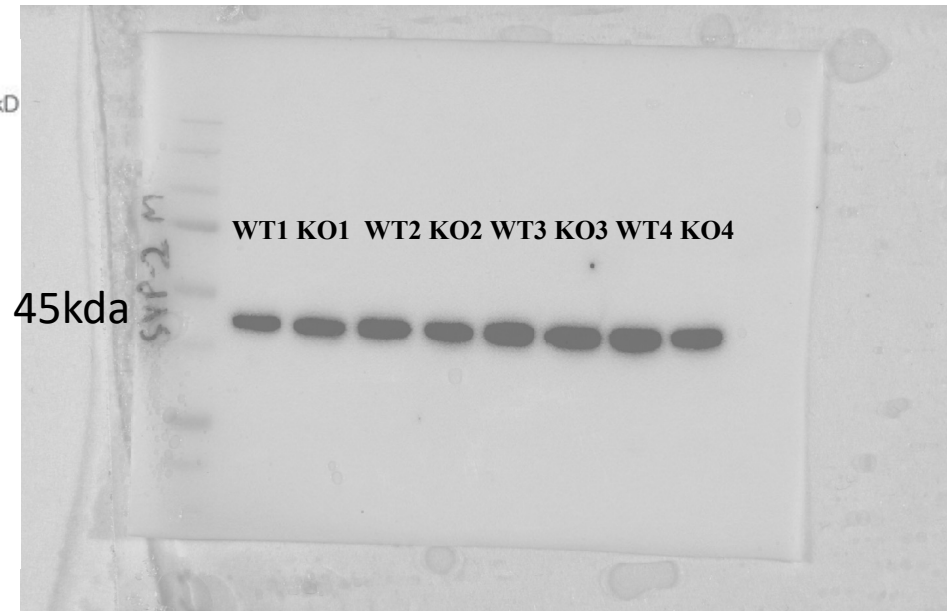

# Shank3 Male VGAT

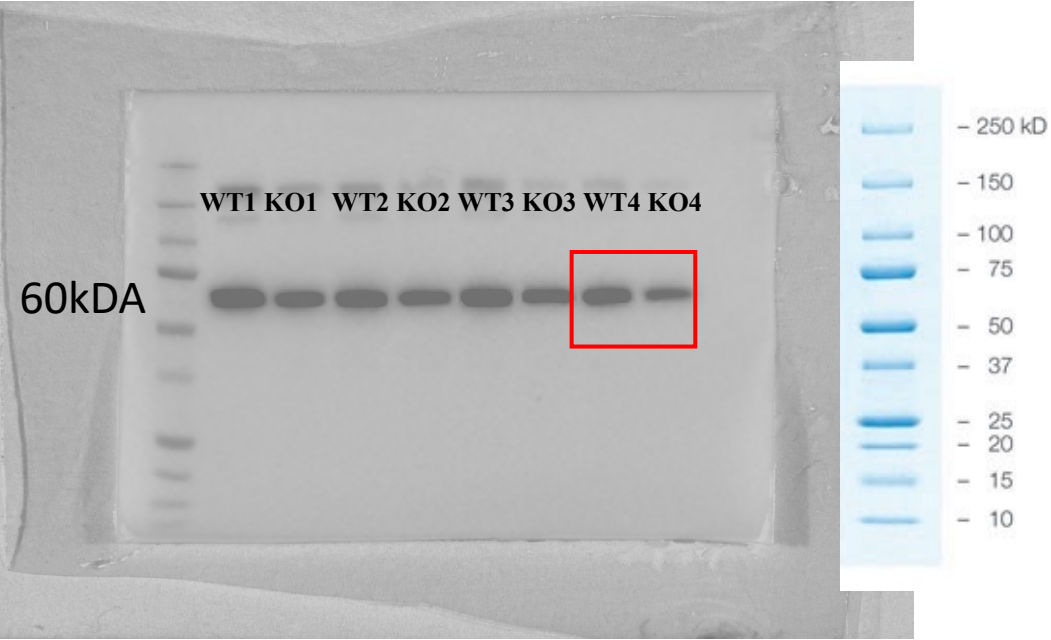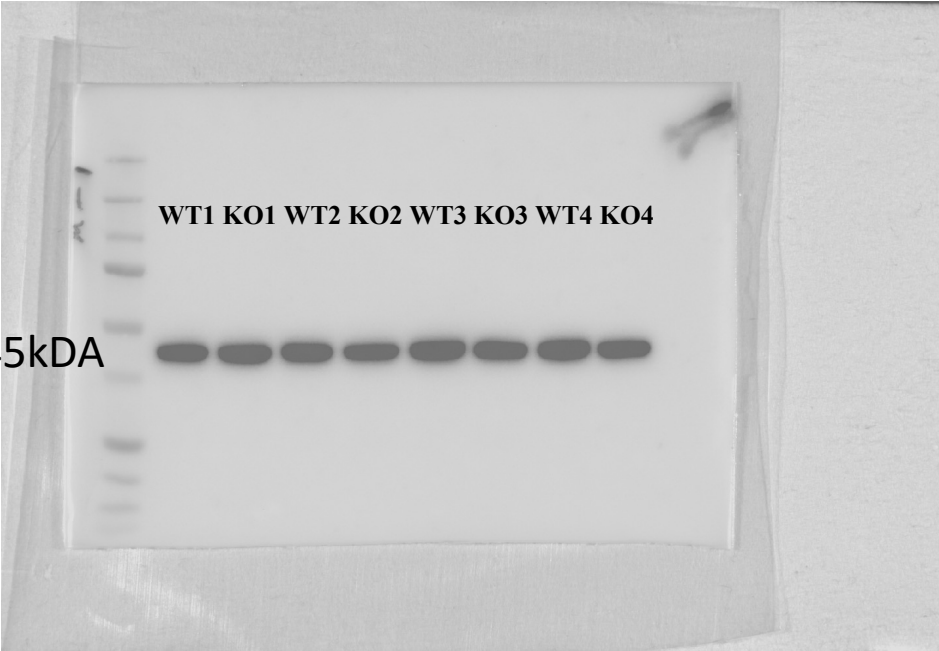

# NR1 Shank3 male

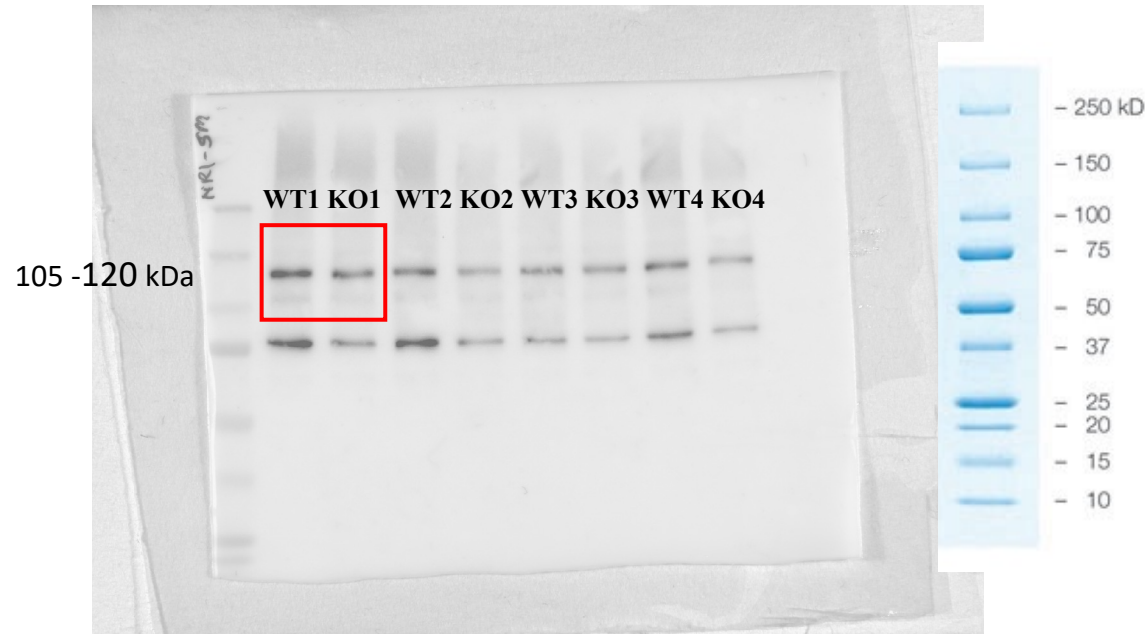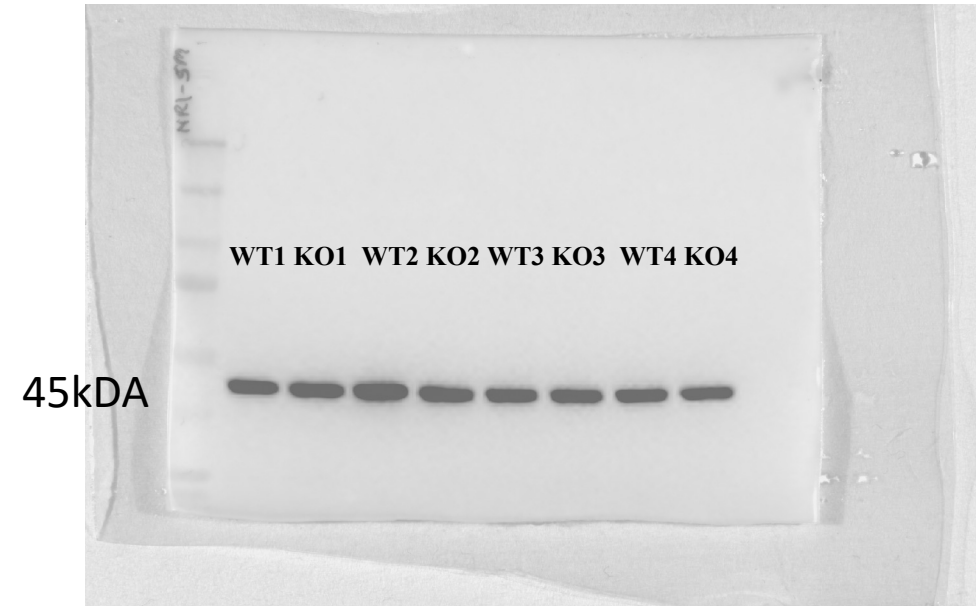

# GAD1 Shank3 male

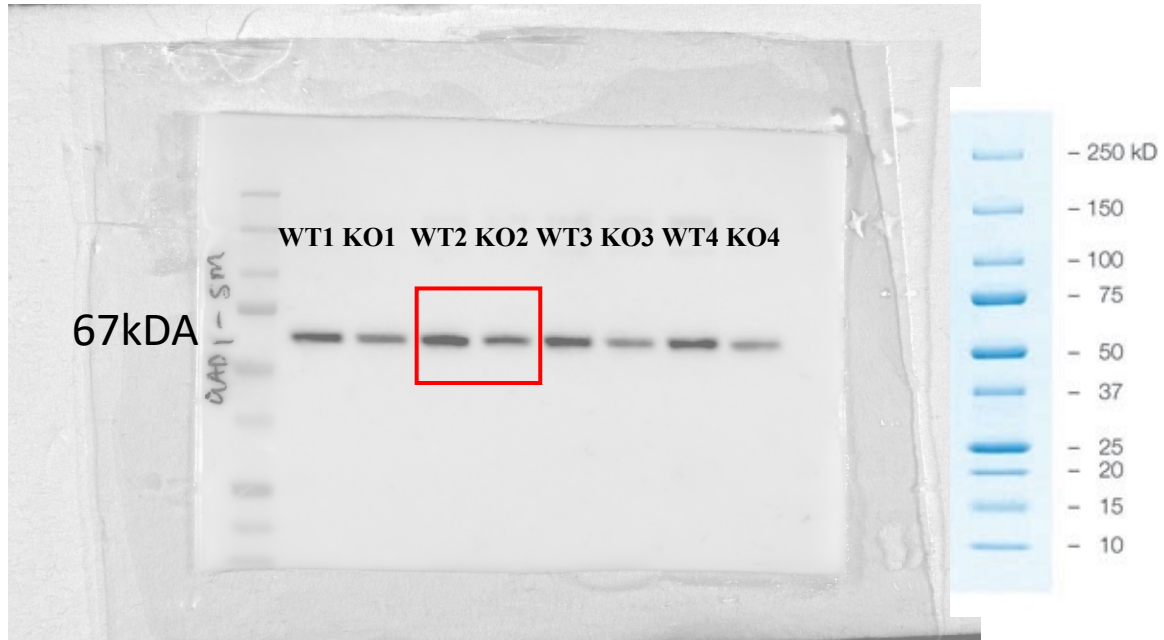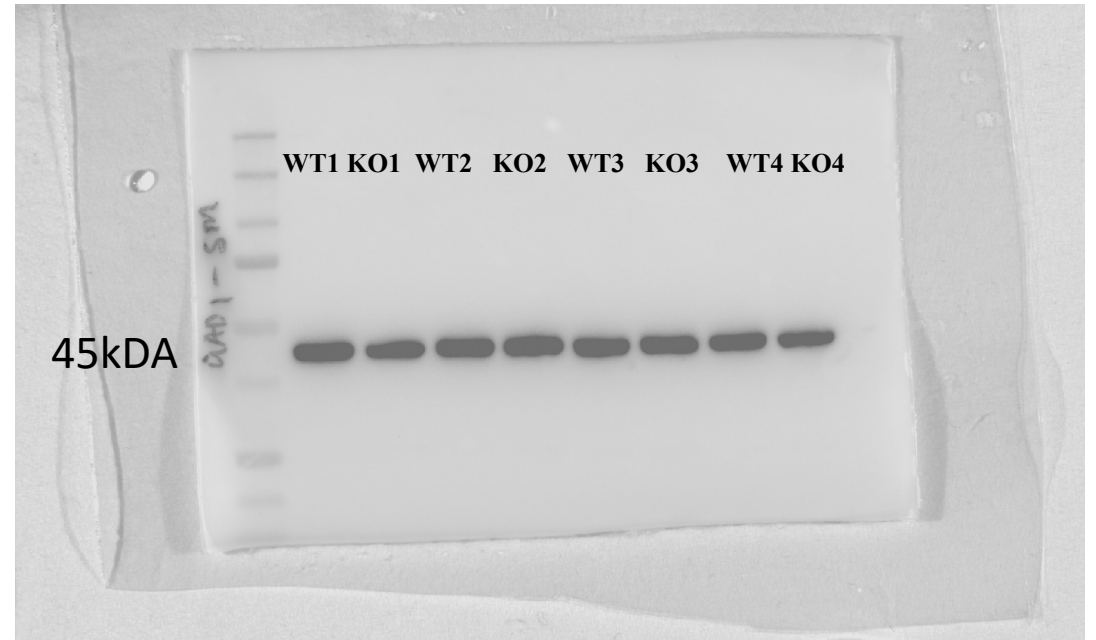

**Cntnap2 Male group**

# Cntnap2 Male SYP

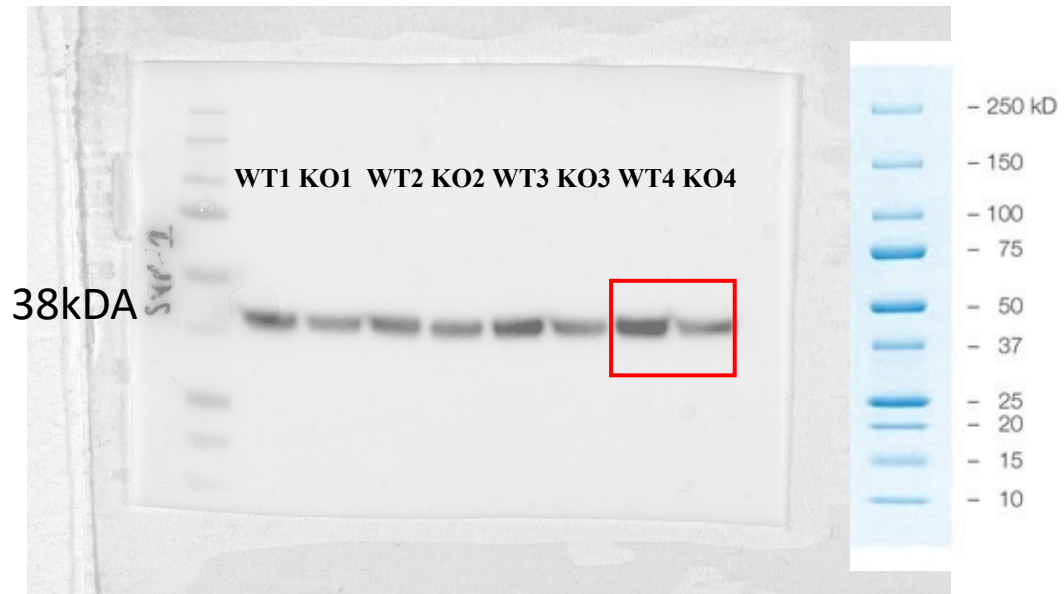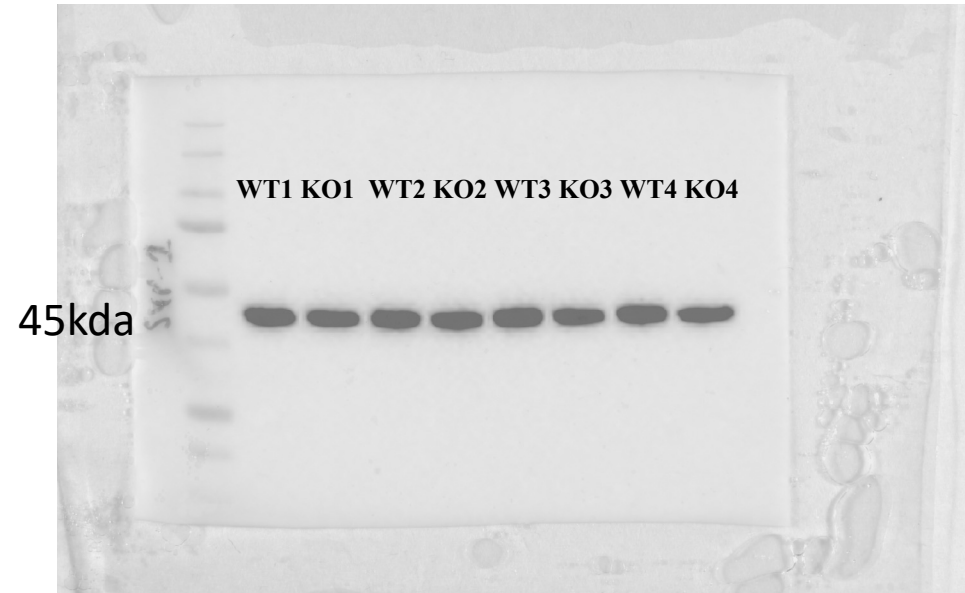



# GAD1 Cntnap2 Male

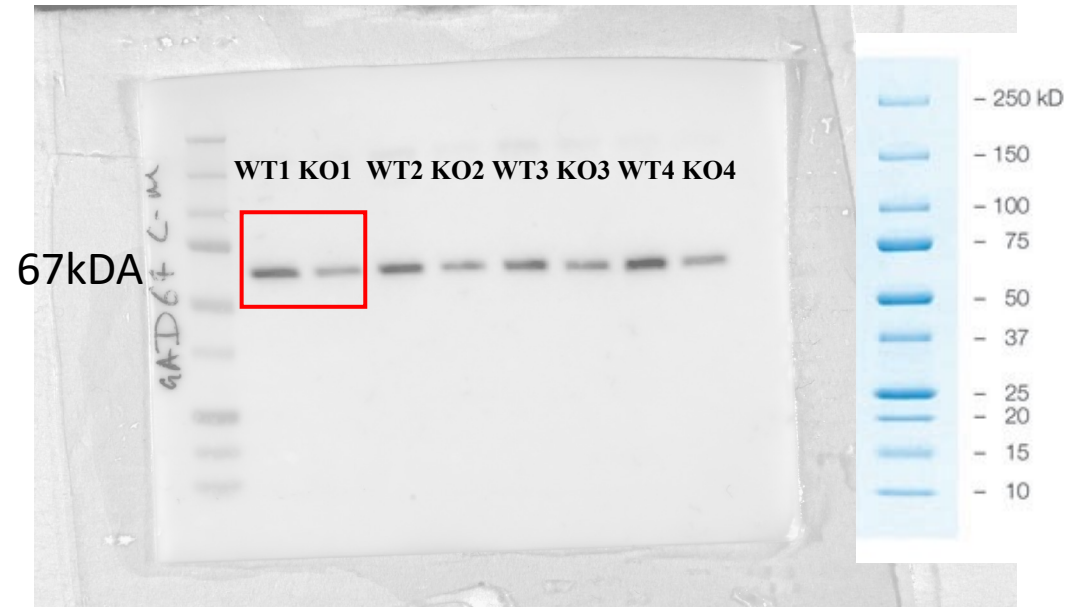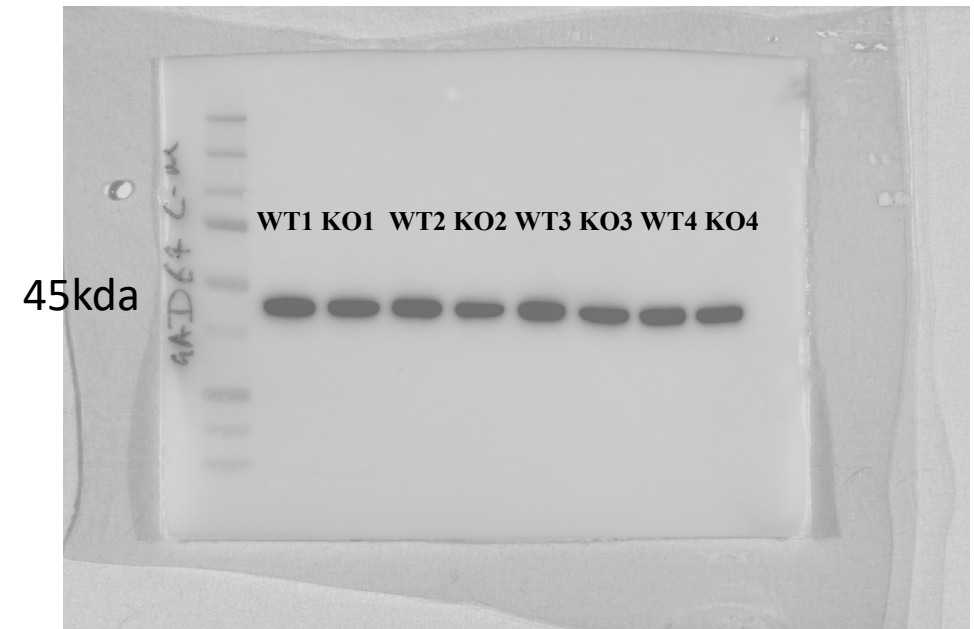

# NR1 Cntnap2 Male

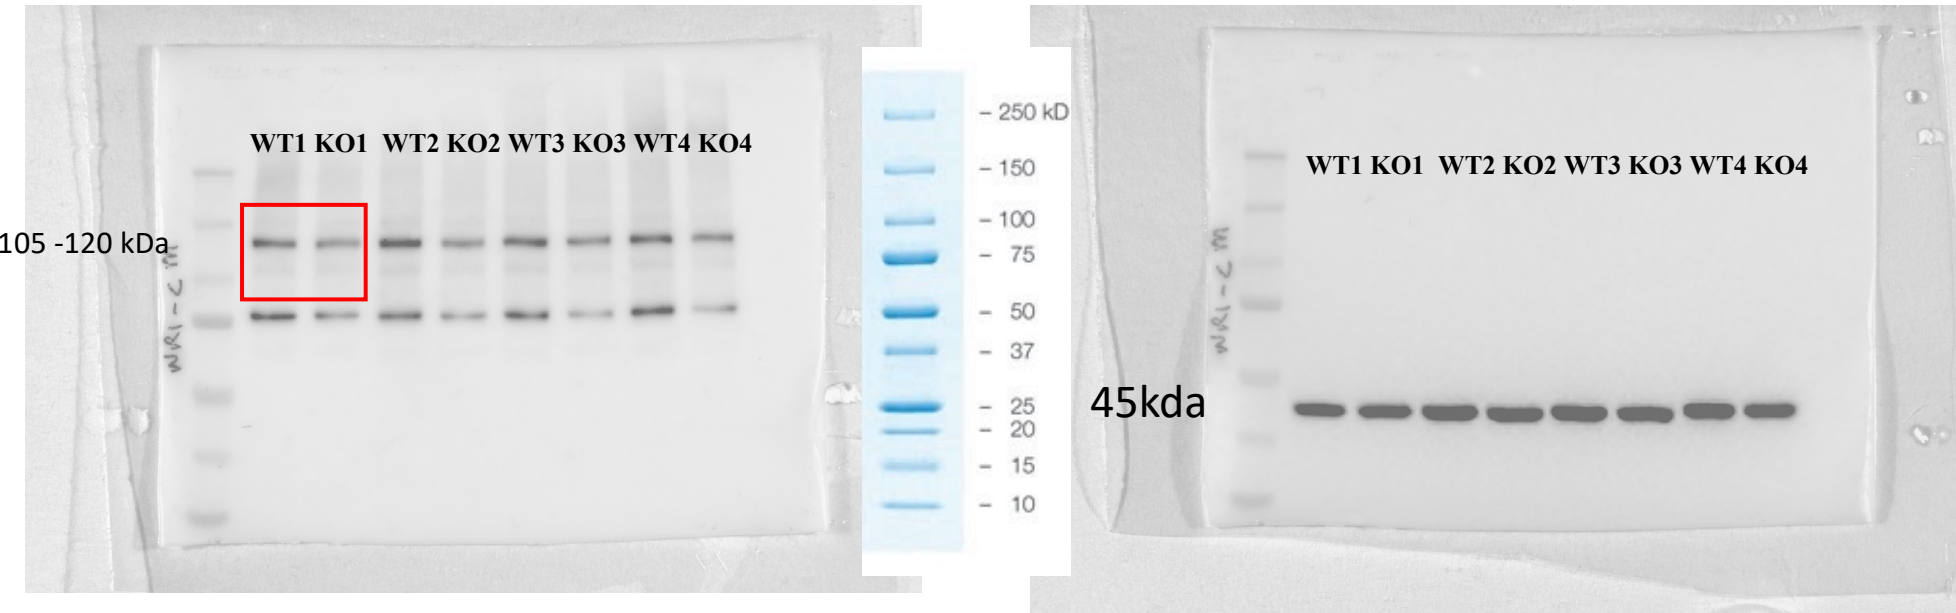

# VGAT Cntnap2 Male

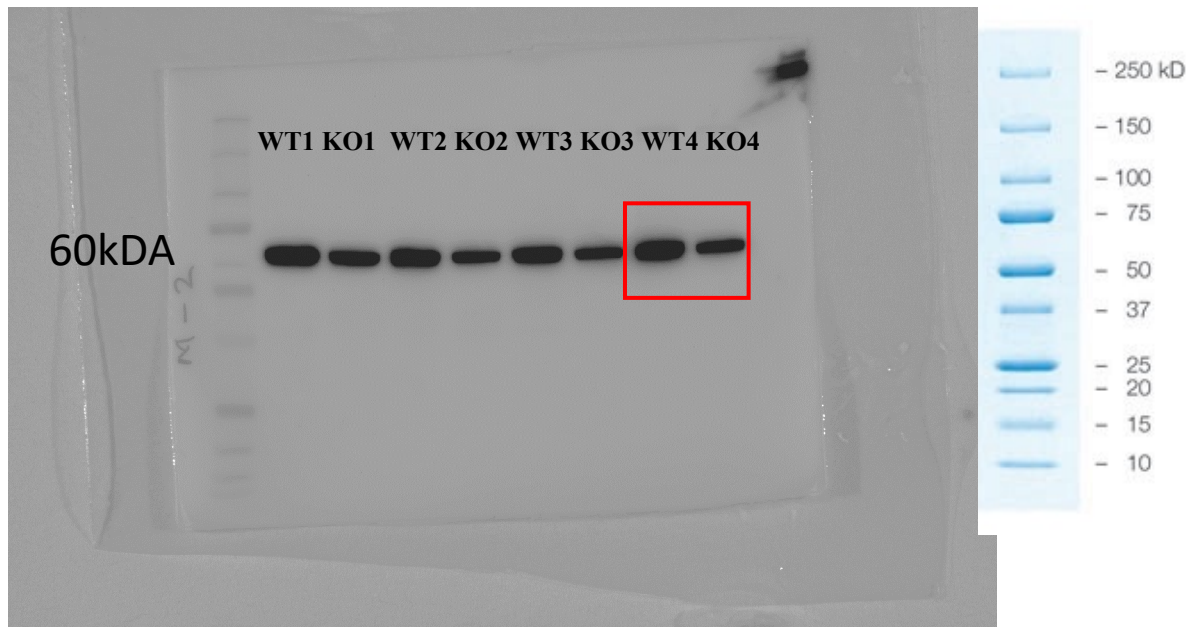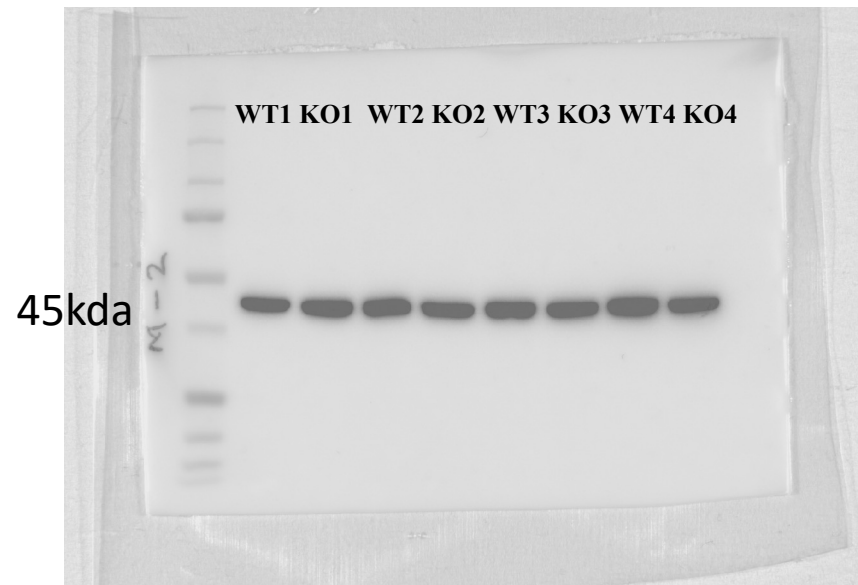

**Shank3 Female group**

# Shank3 Female SYP

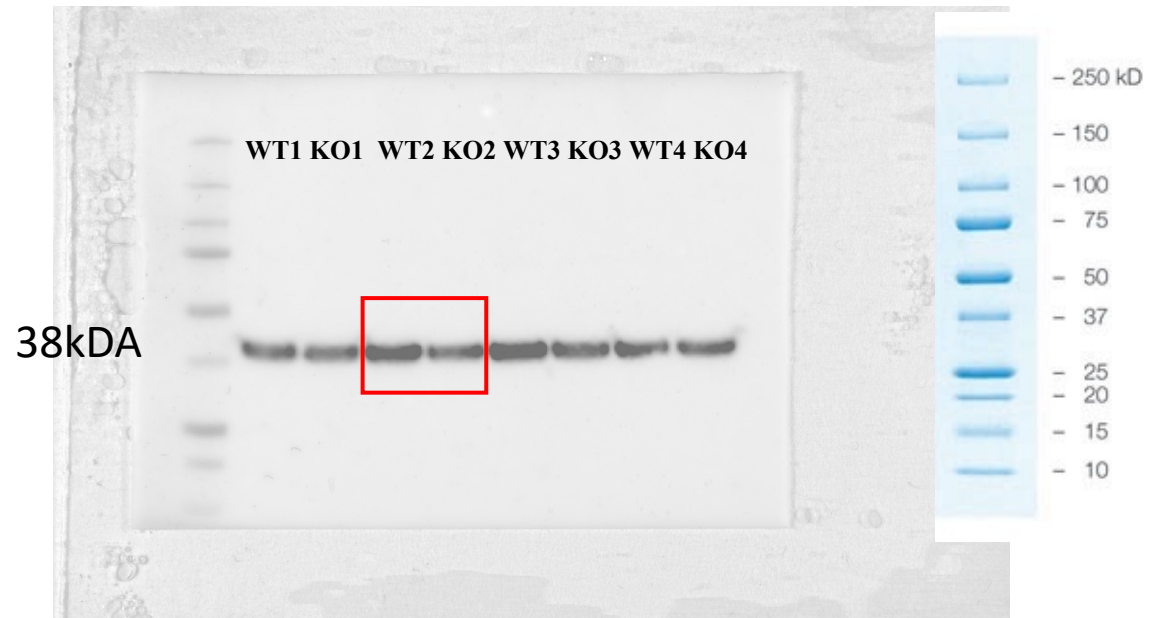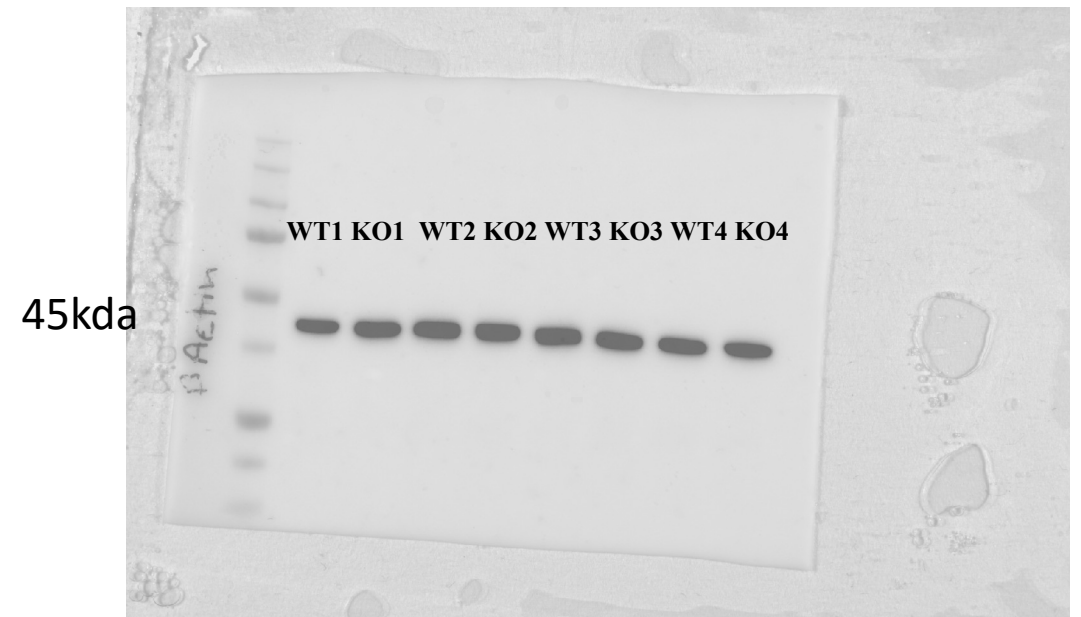

# Shank3 Female NR1

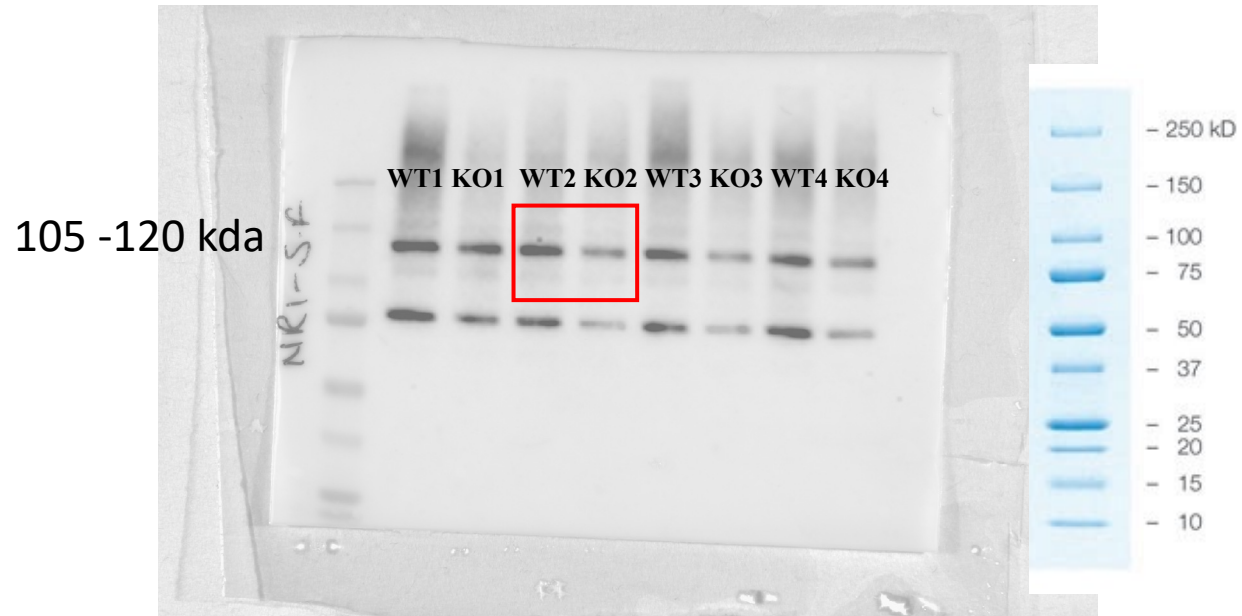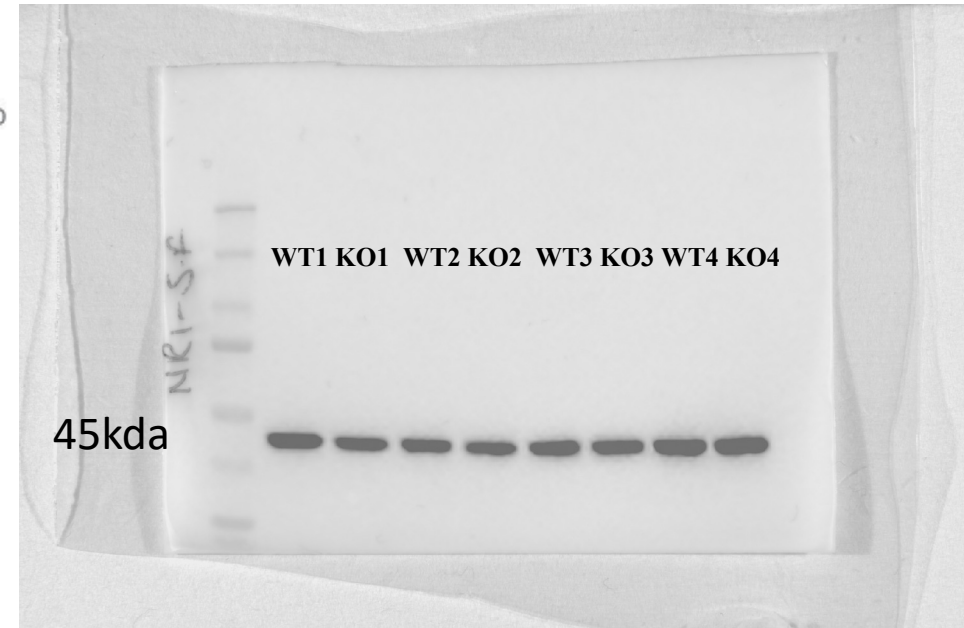

# Shank3 Female GAD1

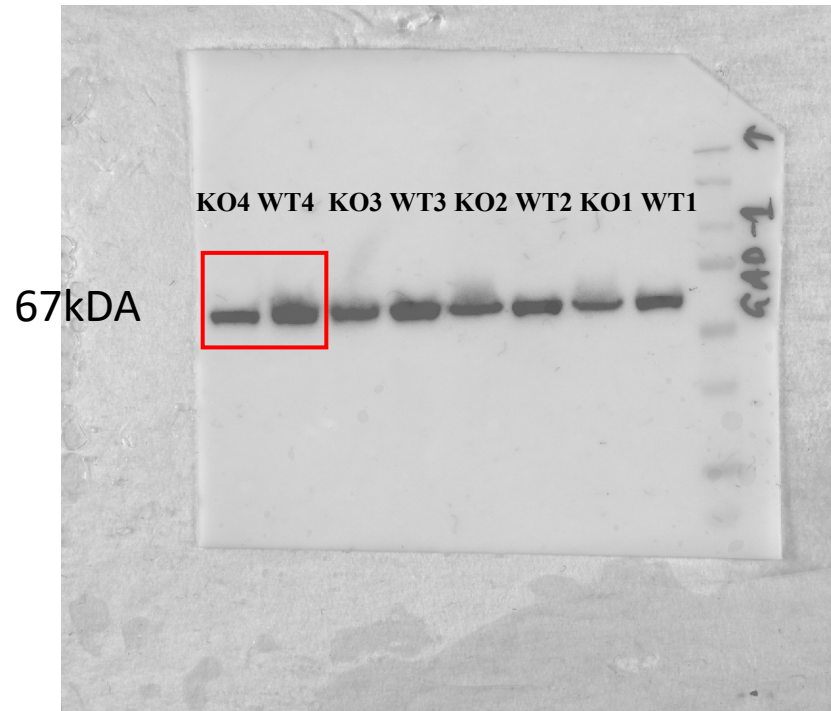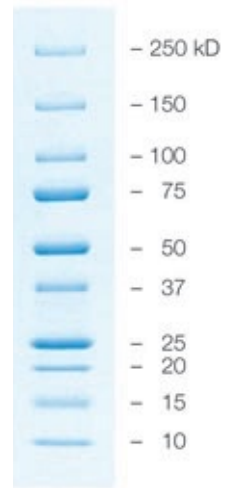

45kda

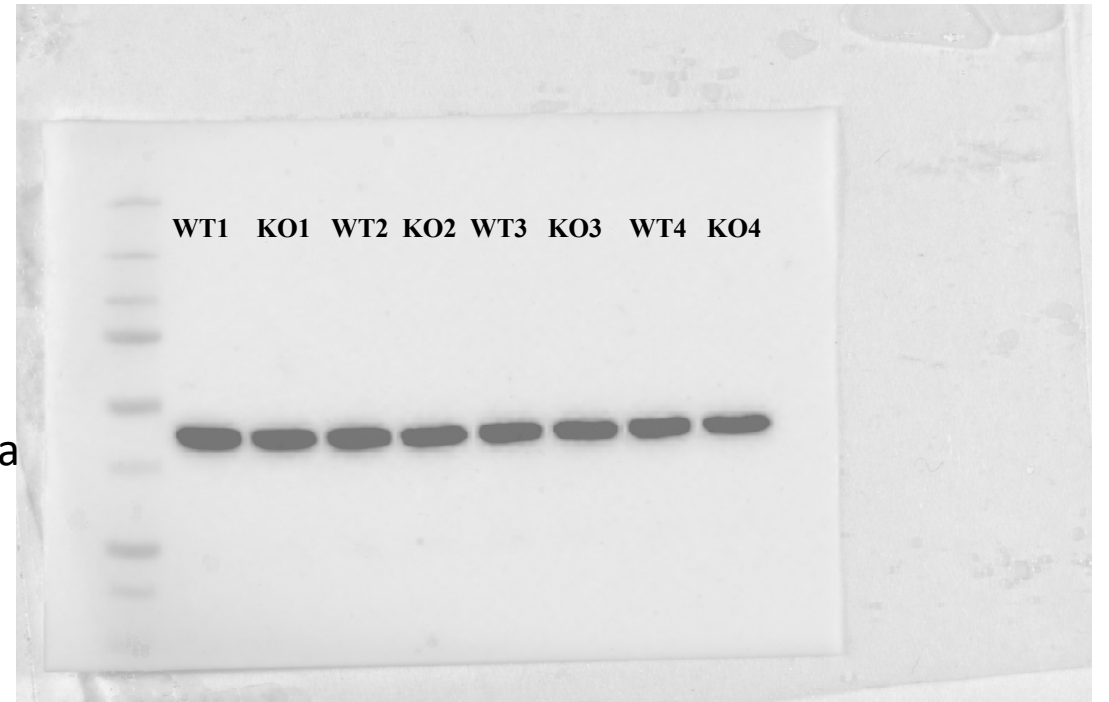

# Shank3 Female VGAT

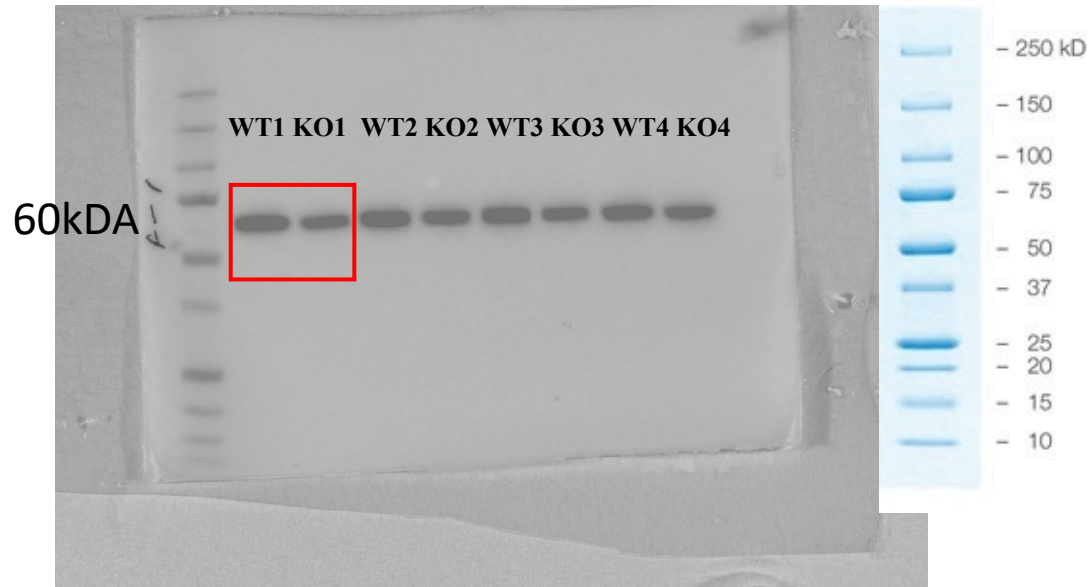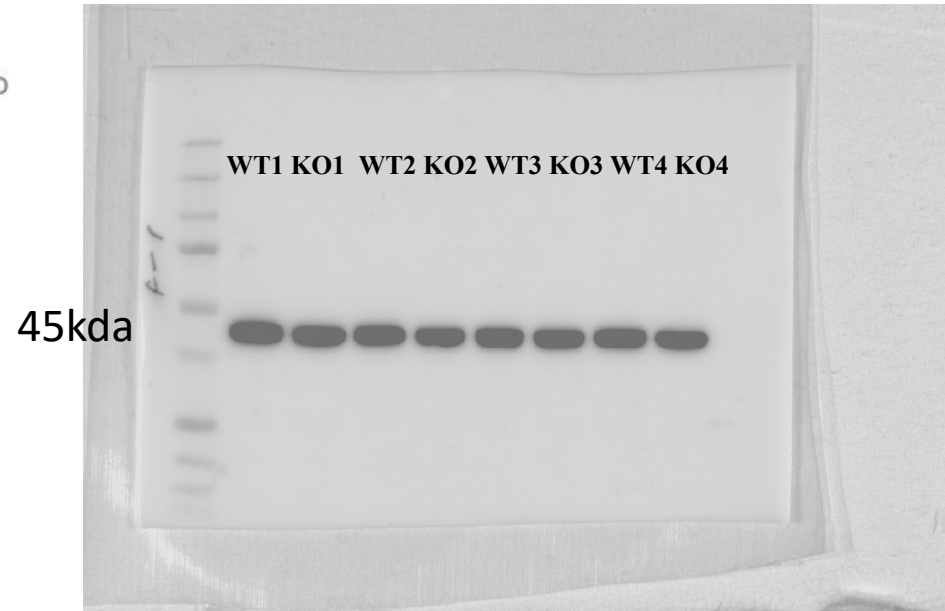



**Cntnap2 female group**

# Cntnap2 female SYP

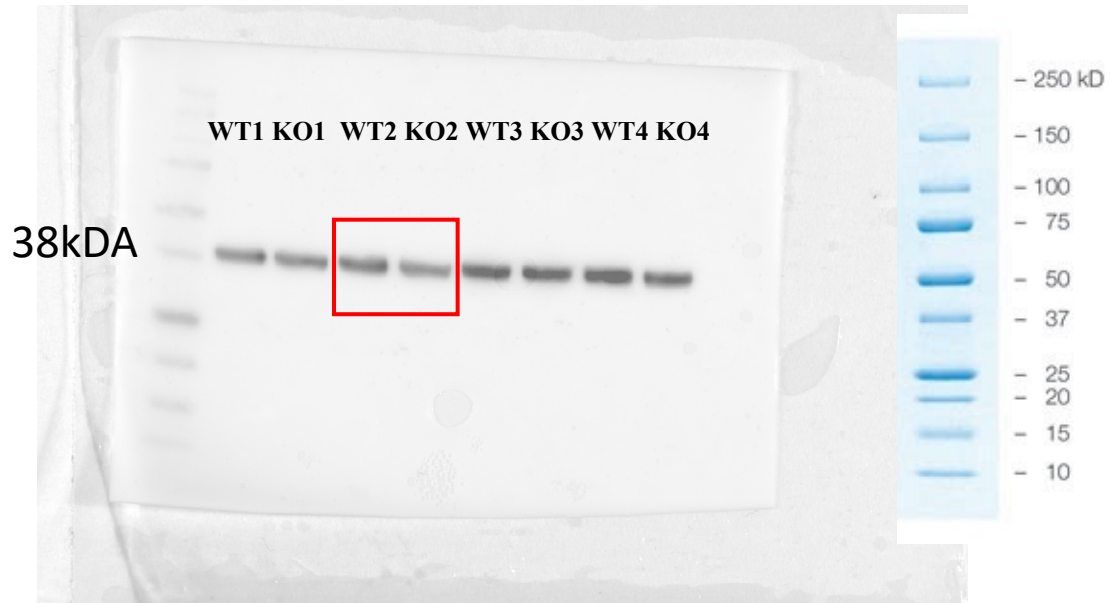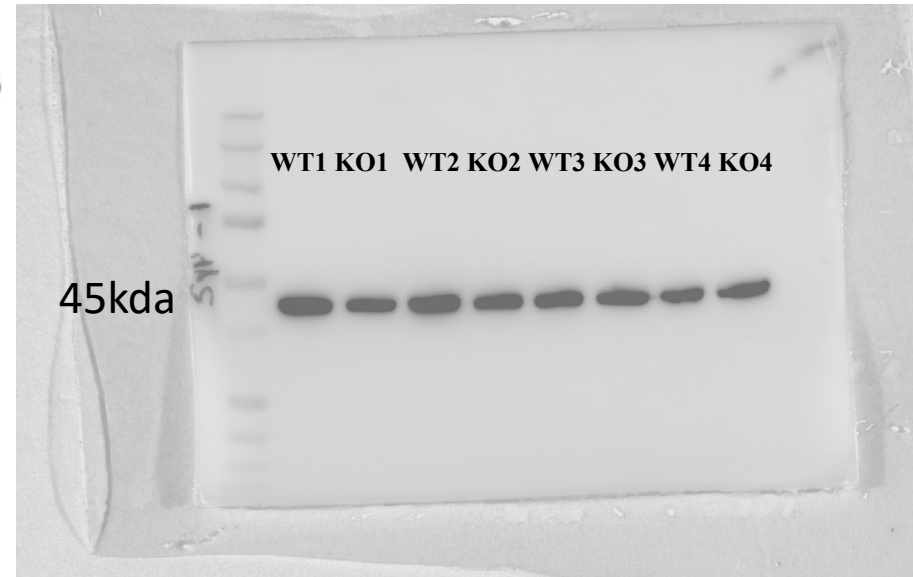

# Cntnap2 female NR1

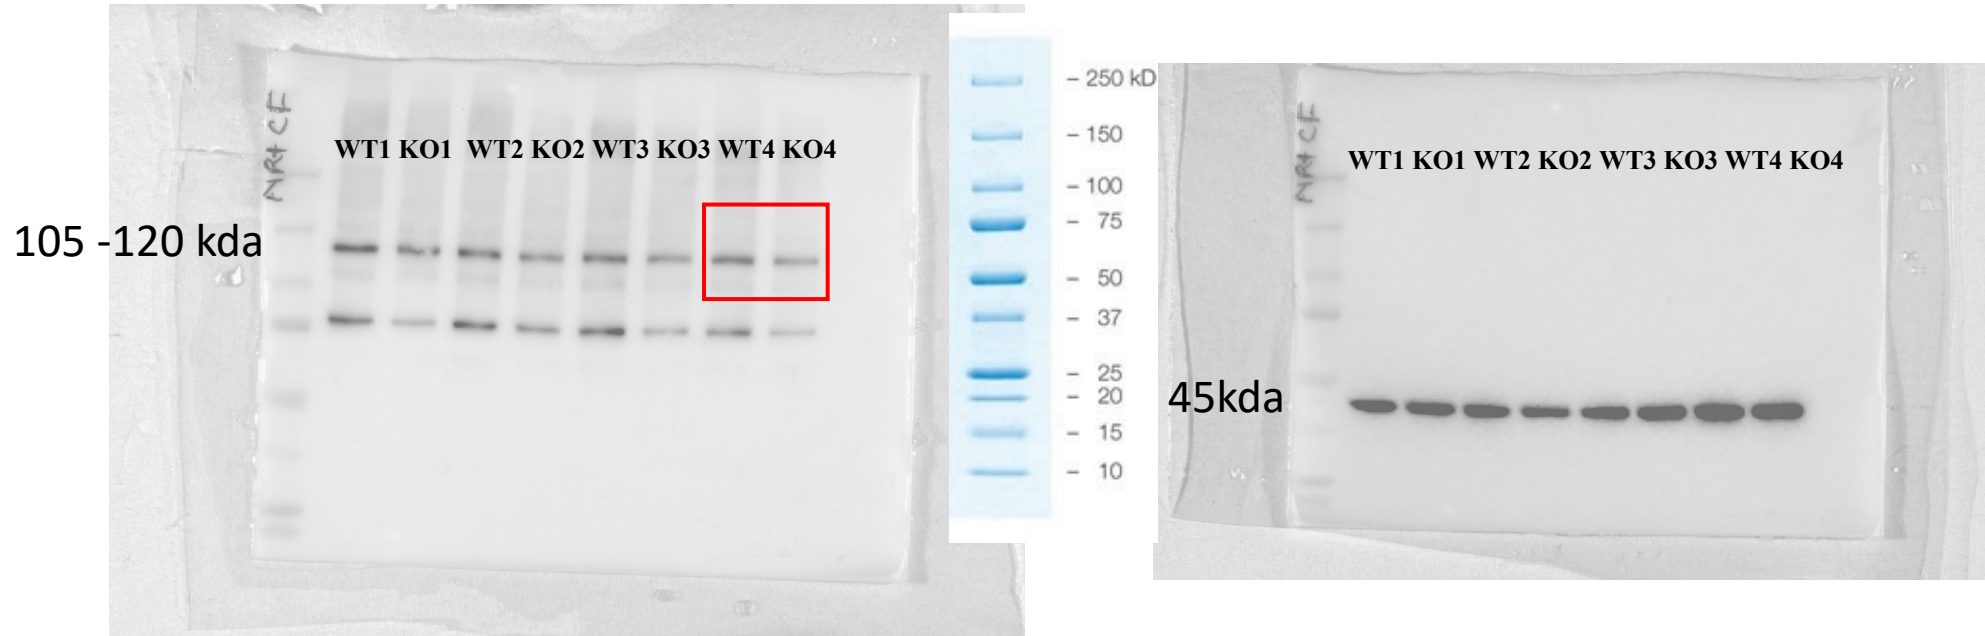

# Cntnap2 female GAD1

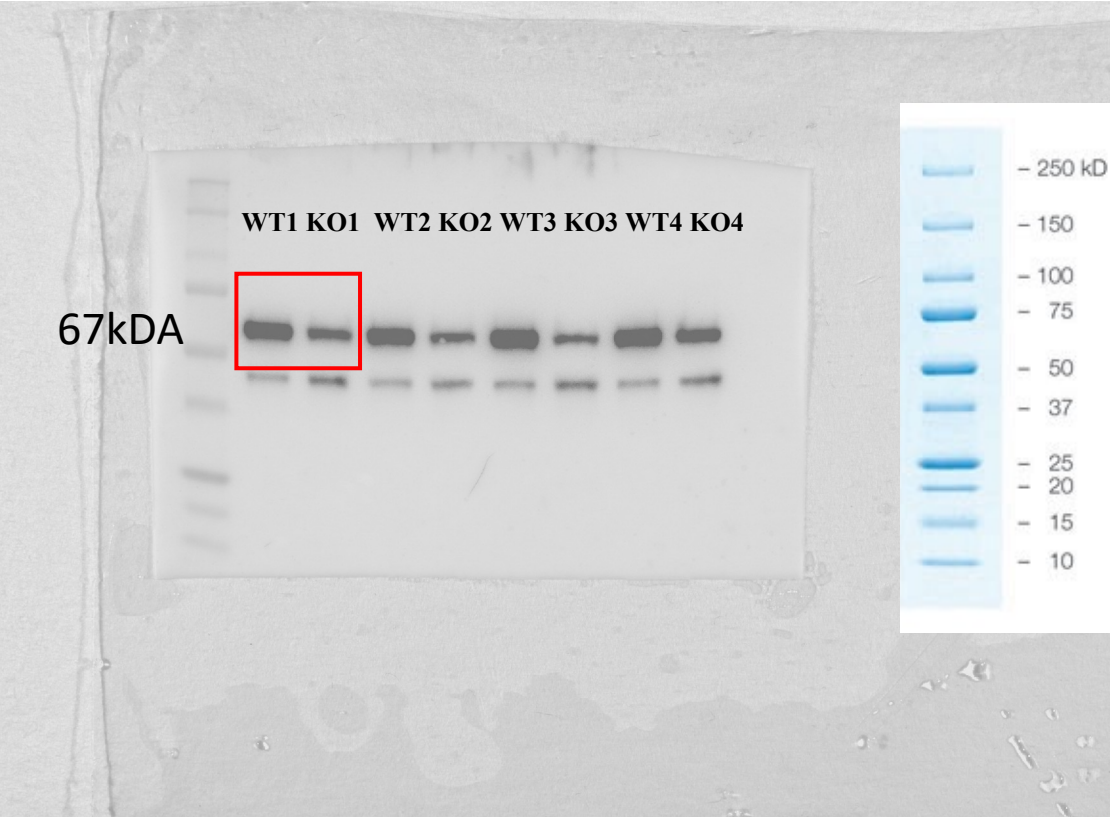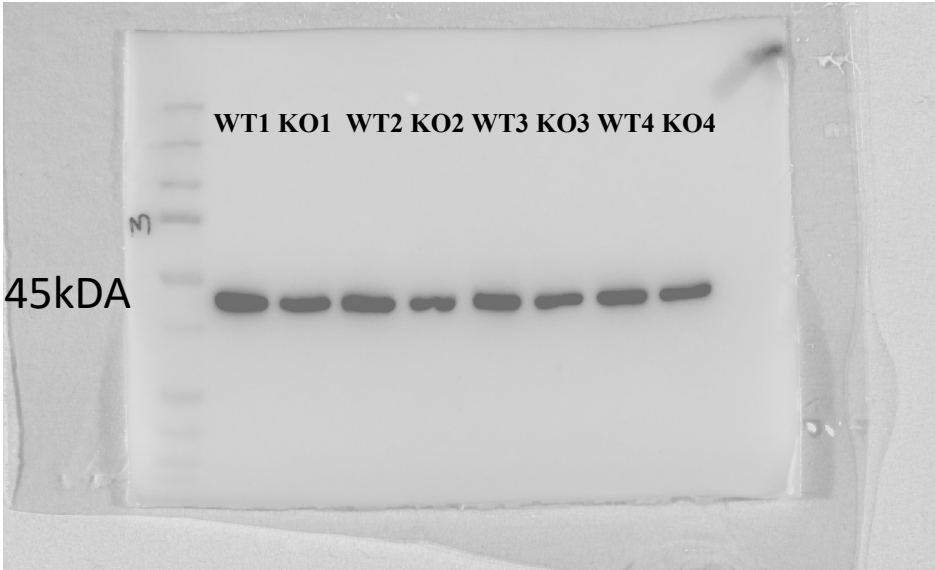

# Cntnap2 female VGAT

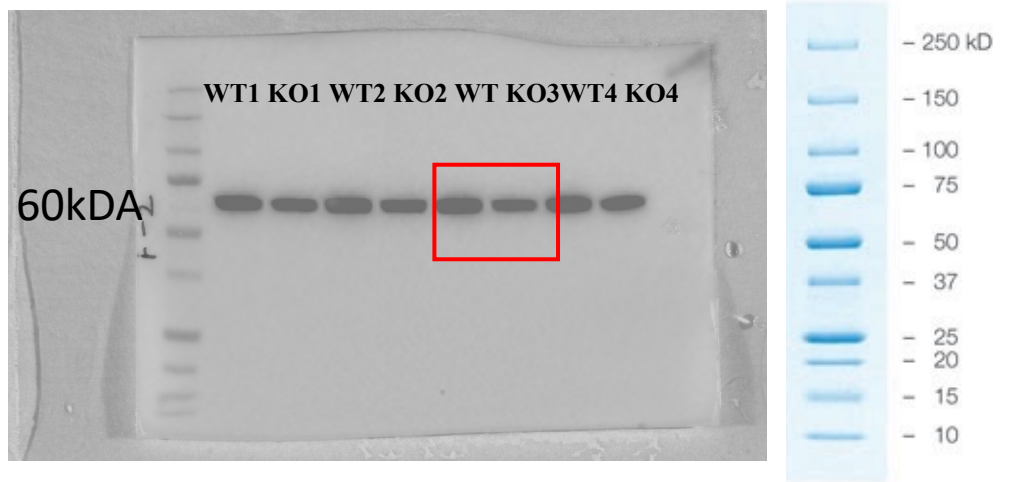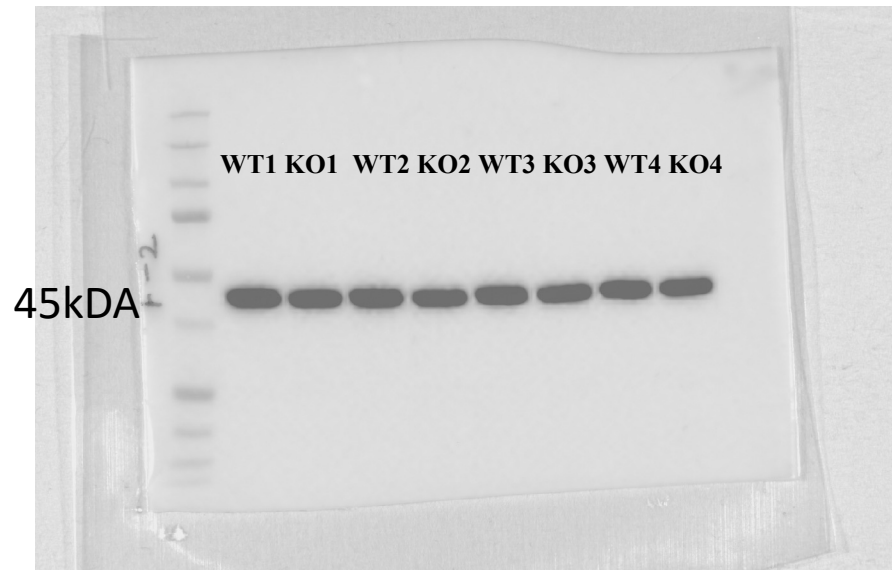

Supplement: 41598_2023_50248_MOESM1_ESM.pdf [file 41598_2023_50248_MOESM1_ESM.pdf]
